# Supplementary material
Source: publisher figshare collection journal article supplement (https://gsajournals.figshare.com/ndownloader/files/26588447)
Supplement: Supplementary file 1 [file 26588447]

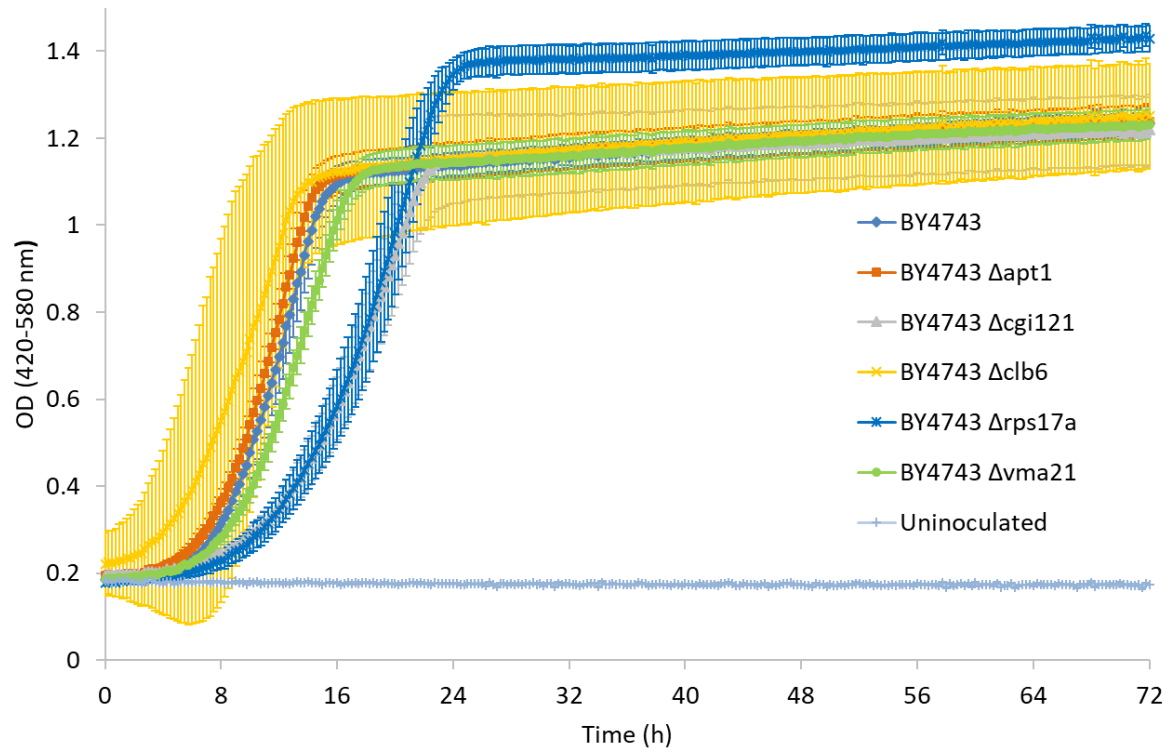

**Fig. S1** Growth of BY4743, BY4743  $\Delta apt1$ , BY4743  $\Delta cgi121$ , BY4743  $\Delta clb6$ , BY4743  $\Delta rps17a$ , and BY4743  $\Delta vma21$ , in YPD medium at 25°C for 72 h (n = 5). OD (optical density) was measured via a wideband filter at 420-580 nm. Error bars represent 95% confidence intervals.
