# Supplementary material
Source: publisher figshare collection journal article supplement (https://gsajournals.figshare.com/ndownloader/files/26588447)
Supplement: Supplementary file 2 [file 26588447]

**File S2** Alignment of the RM11-1a and S288C *BUD32*, *GON7*, *KAE1*, and *PCC1* nucleotide sequences.

```
RM11-1a BUD32      ATGACGCAAGAATTCATTGATAAAGTATCTTCCTACCTGACTCCTGATGTGGACATTGCA 60
S288C BUD32        ATGACGCAAGAATTCATTGATAAAGTATCTTCCTACCTGACTCCTGATGTGGACATTGCA 60
*****

RM11-1a BUD32      CCTATTTCTCAAGGTGCAGAAGCCATTGTTTTCACAACGACTACTCACCATATCTCCCA 120
S288C BUD32        CCTATTTCTCAAGGTGCAGAAGCCATTGTTTTCACAACGACTACTCACCATATCTCCCA 120
*****

RM11-1a BUD32      AGAGCAAAGGATTCTCATCAAAAGTATATTATCAAATATAGGCCACCAAAGCGTTATAGA 180
S288C BUD32        AGAGCAAAGGATTCTCATCAAAAGTATATTATCAAATATAGGCCACCAAAGCGTTATAGA 180
*****

RM11-1a BUD32      CATCCACAAATAGACCAGGCACTAACAAAACATCGTACGTTGAATGAGTCGCGTTTATTG 240
S288C BUD32        CATCCACAAATAGACCAGGCACTAACAAAACATCGTACGTTGAATGAGTCGCGTTTATTG 240
*****

RM11-1a BUD32      GCCAAATTATACTTGATTCCAGGGCTATGTGTCCCTCAACTGATAGCGTGTGATCCATAC 300
S288C BUD32        GCCAAATTATACTTGATTCCAGGGCTATGTGTCCCTCAACTGATAGCGTGTGATCCATAC 300
*****

RM11-1a BUD32      AATGGATTTCATTTGGTTAGAGTTCCTTGGAGAAGATCTTCCCGGAGGGCACGGTTTTAGT 360
S288C BUD32        AATGGATTTCATTTGGTTAGAGTTCCTTGGAGAAGATCTTCCCGGAGGGCACGGTTTTAGT 360
*****

RM11-1a BUD32      AACCTAAAGAACTTCCTTTGGATGCATGACCAAGATCCATATAGTGATCTTGTAGCAACT 420
S288C BUD32        AACCTAAAGAACTTCCTTTGGATGCATGACCAAGATCCATATAGTGATCTTGTAGCAACT 420
*****

RM11-1a BUD32      ACACTACGGAAAGTGGGGCGCCAAATTGGGTTGTTGCACTGGAATGACTACTGTCATGGT 480
S288C BUD32        ACACTACGGAAAGTGGGGCGCCAAATTGGGTTGTTGCACTGGAATGACTACTGTCATGGT 480
*****

RM11-1a BUD32      GATTTGACAAGTTCTAACATTGTTCTCGTGCGAGATGGTGCGAGATGGACGCCTCATTG 540
S288C BUD32        GATTTGACAAGTTCTAACATTGTTCTCGTGCGAGATGGTGCGAGATGGACGCCTCATTG 540
*****
```

|               |                                                               |     |
|---------------|---------------------------------------------------------------|-----|
| RM11-1a BUD32 | ATTGATTTCGGTCTGGGCTCAGTTTCAAACCTGGTCGAAGATAAAGGCGTCGATTTATAC  | 600 |
| S288C BUD32   | ATTGATTTCGGTCTGGGCTCAGTTTCAAACCTGGTCGAAGATAAAGGCGTCGATTTATAC  | 600 |
|               | *****                                                         |     |
| RM11-1a BUD32 | GTCTTAGAGAGAGCTATTTTAAGTACACATTCGAAGCATGCGGAAAAATACAATGCTTGG  | 660 |
| S288C BUD32   | GTCTTAGAGAGAGCTATTTTAAGTACACATTCGAAGCATGCGGAAAAATACAATGCTTGG  | 660 |
|               | *****                                                         |     |
| RM11-1a BUD32 | ATCATGGAGGGGTTCGAAGAGGTCTATCGTGAACAAGGTGCGAAAGGTGCCAAGAACTG   | 720 |
| S288C BUD32   | ATCATGGAGGGGTTCGAAGAGGTCTATCGTGAACAAGGTGCGAAAGGTGCCAAGAACTG   | 720 |
|               | *****                                                         |     |
| RM11-1a BUD32 | AAAGAAGTTACCAAAAGATTCTGAAGAGGTCAGGTTGCGTGGTCGTAAGAGAAGTATGCTA | 780 |
| S288C BUD32   | AAAGAAGTTACCAAAAGATTCTGAAGAGGTCAGGTTGCGTGGTCGTAAGAGAAGTATGCTA | 780 |
|               | *****                                                         |     |
| RM11-1a BUD32 | GGATAA                                                        | 786 |
| S288C BUD32   | GGATAA                                                        | 786 |
|               | *****                                                         |     |
| RM11-1a GON7  | ATGAAACTACCGGTAGCACAGTACAGTGCACCAGATGGTGTGGAAAAAAGTTTGCACCA   | 60  |
| S288C GON7    | ATGAAACTACCGGTAGCACAGTACAGTGCACCAGATGGTGTGGAAAAAAGTTTGCACCA   | 60  |
|               | *****                                                         |     |
| RM11-1a GON7  | ATACGCGATGACCCTCGATACATGACCACAGAGGGAAGGACAACCTGGGCCAGTGACCAT  | 120 |
| S288C GON7    | ATACGCGATGACCCTCGATACATGACCACAGAGGGAAGGACAACCTGGGCCAGTGACCAT  | 120 |
|               | *****                                                         |     |
| RM11-1a GON7  | GTGCTAAACGCTGGCCAAATCGATAGAGACAAACCTTCAGAACCGBAACGCACAAAAGAT  | 180 |
| S288C GON7    | GTGCTAAACGCTGGCCAAATCGATAGAGACAAACCTTCAGAACCGBAACGCACAAAAGAT  | 180 |
|               | *****                                                         |     |
| RM11-1a GON7  | GGCTCACAACCTGACATACTTAGGCCAGCTGCGCACGCAGCTGACGGGGCTACAGGACGAT | 240 |
| S288C GON7    | GGCTCACAACCTGACATACTTAGGCCAGCTGCGCACGCAGCTGACGGGGCTACAGGACGAT | 240 |
|               | *****                                                         |     |

RM11-1a GON7 ATTAACGAGTTTTTGACAGGAAGAATGGAATTGGCAAAAAATAAGAAGAAAGCCGGCGCA 300  
S288C GON7 ATTAACGAGTTTTTGACAGGAAGAATGGAATTGGCAAAAAATAAGAAGAAAGCCGGCGCA 300

\*\*\*\*\*

RM11-1a GON7 GACGAGAAGCGGATCCAGGAAGAGATTAATCAGCTATTAGATGGTGGTGATGGTGACGAA 360  
S288C GON7 GACGAGAAGCGGATCCAGGAAGAGATTAACCAGCTATTAGATGGTGGTGACGGTGACGAA 360

\*\*\*\*\*

RM11-1a GON7 GATGCTGTTTAG 372  
S288C GON7 GATGCTGTTTAG 372

\*\*\*\*\*

RM11-1a KAE1 ATGGTCAACTTGAACACTATCCCACCCAAAAATGGCAGGGACTACTACATTGCGCTTGA 60  
S288C KAE1 ATGGTCAACTTGAACACTATCCCACCCAAAAATGGCAGGGACTACTACATTGCGCTTGA 60

\*\*\*\*\*

RM11-1a KAE1 CTCGAAGGTTCTGCAAATAAACTGGGCGTTGGTATAGTTAAGCATCCGCTTCTGCCTAAA 120  
S288C KAE1 CTTGAAGGTTCTGCAAATAAACTGGGCGTTGGTATAGTTAAGCATCCGCTTCTGCCTAAA 120

\*\* \*\*\*\*\*

RM11-1a KAE1 CATGCCAACAGCGATCTATCTTATGATTGCGAAGCTGAGATGCTTTCTAATATTAGAGAC 180  
S288C KAE1 CATGCCAACAGCGATCTATCTTATGATTGCGAAGCTGAGATGCTTTCTAATATTAGAGAC 180

\*\*\*\*\*

RM11-1a KAE1 ACATATGTCACACCTCCTGGGGAGGGATTTTTGCCTCGAGACACGGCAAGGCATCACAGA 240  
S288C KAE1 ACATATGTCACACCTCCTGGGGAGGGATTTTTGCCTCGAGACACGGCAAGGCATCACAGA 240

\*\*\*\*\*

RM11-1a KAE1 AATTGGTGCATAAGACTCATAAAACAAGCACTGGCCGAAGCTGACATCAAAAACCCGACA 300  
S288C KAE1 AATTGGTGCATAAGACTCATAAAACAAGCACTGGCCGAAGCTGACATCAAAAAGCCCGACA 300

\*\*\*\*\*

RM11-1a KAE1 CTAGACATTGATGTAATTTGCTTTACCAAAGGTCCCGGCATGGGGGCCCTCTGCATTCA 360  
S288C KAE1 CTAGACATTGATGTAATTTGCTTTACCAAAGGTCCCGGCATGGGGGCCCTCTGCATTCA 360

\*\*\*\*\*

RM11-1a KAE1 GTTGTTCATCGCCGCCAGAACGTGCTCCTTACTGTGGGACGTGCCACTGGTGGGAGTAAAC 420  
S288C KAE1 GTTGTTCATCGCCGCCAGAACGTGCTCCTTACTGTGGGACGTGCCACTGGTGGGAGTAAAC 420

\*\*\*\*\*

RM11-1a KAE1 CACTGCATTGGTCACATCGAAATGGGGAGAGAAATCACTAAAGCTCAAAATCCTGTGGTA 480  
S288C KAE1 CACTGCATTGGTCACATCGAAATGGGGAGAGAAATCACTAAAGCTCAAAATCCTGTGGTA 480

\*\*\*\*\*

RM11-1a KAE1 CTGTATGTAAGTGGTGGAAATACACAGGTTATTGCATACTCGGAAAAAAGGTACCGTATC 540  
S288C KAE1 CTGTATGTAAGTGGTGGAAATACACAAGTTATTGCATACTCGGAAAAAAGGTACCGTATC 540

\*\*\*\*\*

RM11-1a KAE1 TTTGGTGAAACGCTTGATATTGCTATCGGTAATTGTCTTGATAGATTGCAAGAACTCTG 600  
S288C KAE1 TTTGGTGAAACGCTTGATATTGCTATCGGTAATTGTCTTGATAGATTGCAAGAACTCTG 600

\*\*\*\*\*

RM11-1a KAE1 AAGATACCTAATGAGCCCTCGCCTGGCTACAACATCGAGCAGTTAGCTAAAAAAGCCCCT 660  
S288C KAE1 AAGATACCTAATGAGCCCTCGCCTGGCTACAACATCGAGCAGTTAGCTAAAAAAGCCCCT 660

\*\*\*\*\*

RM11-1a KAE1 CACAAAGAAAACCTTGGTAGAACTTCCCTATACAGTAAAGGGGATGGATCTTTCGATGAGT 720  
S288C KAE1 CACAAAGAAAACCTTGGTAGAACTTCCCTATACAGTAAAGGGGATGGATCTTTCGATGAGT 720

\*\*\*\*\*

RM11-1a KAE1 GGTATATTGGCTTCCATCGATTTACTTGCCAAGGATCTATTTAAGGGCAATAAGAAAAAT 780  
S288C KAE1 GGTATATTGGCTTCCATCGATTTACTTGCCAAGGATCTATTTAAGGGCAATAAGAAAAAT 780

\*\*\*\*\*

RM11-1a KAE1 AAGATCCTATTCGACAAGACAACGGGCGAGCAAAAAGTCACTGTAGAGGATCTTTGCTAC 840  
S288C KAE1 AAGATCCTATTCGACAAGACAACGGGCGAGCAAAAAGTCACTGTAGAGGATCTTTGCTAC 840

\*\*\*\*\*

RM11-1a KAE1 TCTCTGCAAGAGAACCTATTCGCCATGCTAGTTGAAATAACAGAAAGAGCTATGGCTCAC 900  
S288C KAE1 TCTCTGCAAGAGAACCTATTCGCCATGCTAGTTGAAATAACAGAAAGAGCTATGGCTCAC 900

\*\*\*\*\*

RM11-1a KAE1 GTTAACTCCAATCAAGTTTTGATCGTAGGCGGTGTTGGTTGTAACGTGCGATTACAAGAG 960

S288C KAE1 GTTAACTCCAATCAAGTTTTGATCGTAGGCGGTGTTGGTTGTAACGTGCGATTACAAGAA 960

\*\*\*\*\*

RM11-1a KAE1 ATGATGGCGCAAATGTGTAAAGACAGGGCCAATGGGCAAGTACATGCTACAGATAATAGG 1020

S288C KAE1 ATGATGGCGCAAATGTGTAAAGACAGGGCCAATGGGCAAGTACATGCTACAGATAATAGG 1020

\*\*\*\*\*

RM11-1a KAE1 TTTTGTATCGATAACGGAGTTATGATTGCCCAAGCAGGACTACTAGAGTATAGAATGGGT 1080

S288C KAE1 TTTTGTATCGATAACGGAGTTATGATTGCCCAAGCAGGACTACTAGAGTATAGAATGGGT 1080

\*\*\*\*\*

RM11-1a KAE1 GGGATCGTGAAGGACTTTTCTGAAACTGTTGTTACGCAGAAATTCAGAACCGATGAAGTA 1140

S288C KAE1 GGGATCGTGAAGGACTTTTCTGAAACTGTTGTTACGCAGAAATTCAGAACCGATGAAGTA 1140

\*\*\*\*\*

RM11-1a KAE1 TACGCAGCCTGGCGTGATTAA 1161

S288C KAE1 TACGCAGCCTGGCGTGATTAA 1161

\*\*\*\*\*

RM11-1a PCC1 ATGACAAGCAAACGGGAAAAGTCACTGGATCACACATTGTAAGTAGAAGCAGTTTTTCAA 60

S288C PCC1 ATGACAAGCAAACGGGAAAAGTCACTGGATCACACATTGTAAGTAGAAGCAGTTTTTCAA 60

\*\*\*\*\*

RM11-1a PCC1 TGGAAGACCGCACTGCATAGTTTACTAACTATTTAACTTTCCAAACATTAGAGAACTA 120

S288C PCC1 TGGAAGACCGCACTGCATAGTTTACTAACTATTTAACTTTCCAAACATTAGAGAACTA 120

\*\*\*\*\*

RM11-1a PCC1 AAGATACCGTTTGAAACGGAGCGACAAGCGACCATAGCAACCAAAGTCCTATCTCCGGAC 180

S288C PCC1 AAGATACCGTTTGAAACGGAGCGACAAGCGACCATAGCAACCAAAGTCCTATCTCCGGAC 180

\*\*\*\*\*

RM11-1a PCC1 CCGATTTTGAAGCCACAAGATTTTCAAGTAGACTACAGTCCGAGAAAAATGTCATGCTA 240

S288C PCC1 CCGATTTTGAAGCCACAAGATTTTCAAGTAGACTACAGTCCGAGAAAAATGTCATGCTA 240

\*\*\*\*\*

|              |                                                              |     |
|--------------|--------------------------------------------------------------|-----|
| RM11-1a PCC1 | GTCCAGTTCAGAAGCATTGATGATAGGGTGCTTCGAGTGGGAGTTAGCAGTATCATAGAC | 300 |
| S288C PCC1   | GTCCAGTTCAGAAGCATTGATGATAGGGTGCTTCGAGTGGGAGTTAGCAGTATCATAGAC | 300 |
|              | *****                                                        |     |

|              |                                            |     |
|--------------|--------------------------------------------|-----|
| RM11-1a PCC1 | AGTATCAAAACCATTGTGGAAGCCATGGACGTTCTATCATAA | 342 |
| S288C PCC1   | AGTATCAAAACCATTGTGGAAGCCATGGACGTTCTATCATAA | 342 |
|              | *****                                      |     |
